# Supplementary material for: Photo-excited charge transfer from adamantane to electronic bound states in water
Source: Royal Society of Chemistry journal article supplement (doi:10.1039/d3cp04602h), 2024-01-01
Supplement: d3cp04602h1.pdf [file d3cp04602h1.pdf]

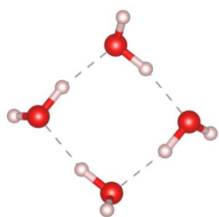

$$\mu_0 = 0.000\text{D}$$

4N

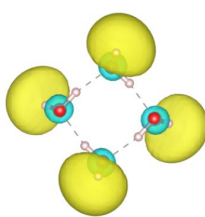

$$\varepsilon_L = 0.047\text{eV}$$

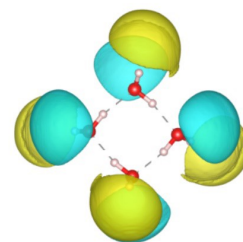

$$E_A = -0.610\text{meV}$$

$$V_m = 0.065\text{eV}$$

---

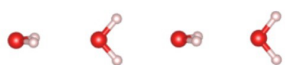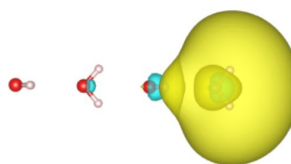

$$V_m = 0.100\text{eV}$$

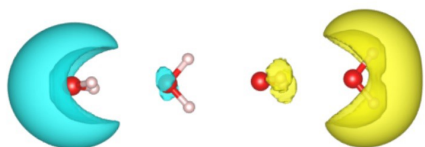

$$\mu_0 = 9.634\text{D}$$

$$\varepsilon_L = -0.620\text{eV}$$

4Lbif

$$E_A = 11.451\text{meV}$$

---

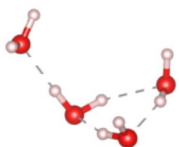

$$\mu_0 = 6.544\text{D}$$

4Y31

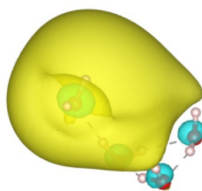

$$\varepsilon_L = -0.619\text{eV}$$

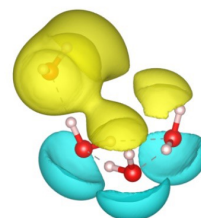

$$E_A = 11.303\text{meV}$$

$$V_m = 0.102\text{eV}$$

---

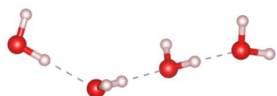

$$\mu_0 = 9.247\text{D}$$

4Lda

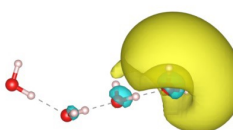

$$\varepsilon_L = -0.707\text{eV}$$

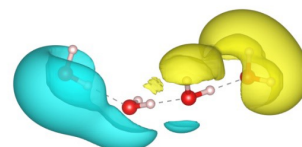

$$E_A = 13.516\text{meV}$$

$$V_m = 0.109\text{eV}$$
