# Supplementary material for: Photo-excited charge transfer from adamantane to electronic bound states in water
Source: Royal Society of Chemistry journal article supplement (doi:10.1039/d3cp04602h), 2024-01-01
Supplement: d3cp04602h2.pdf [file d3cp04602h2.pdf]

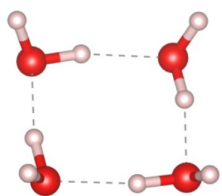

$$\mu_0 = 5.059\text{D}$$

4Rda

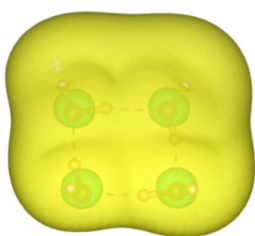

$$\varepsilon_L = -0.2333\text{eV}$$

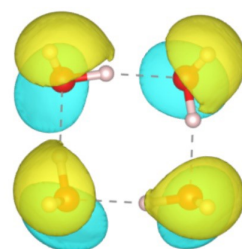

$$E_A = 4.480\text{meV}$$

$$V_m = 0.073\text{eV}$$

---

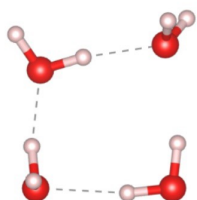

$$\mu_0 = 7.795\text{D}$$

4Rdd

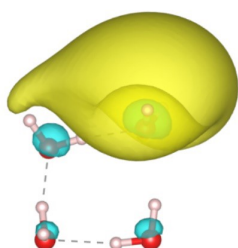

$$\varepsilon_L = -0.728\text{eV}$$

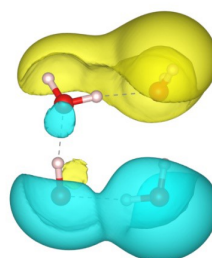

$$E_A = 18.585\text{meV}$$

$$V_m = 0.119\text{eV}$$

---

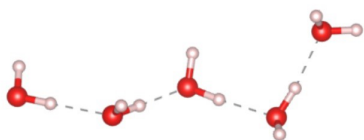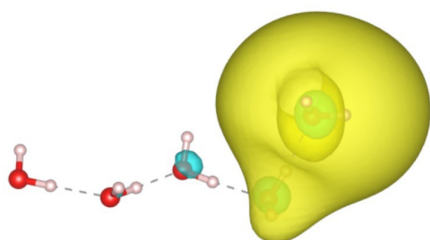

5Lda

$$E_A = 17.450\text{meV}$$

$$\mu_0 = 11.531\text{D}$$

$$V_m = 0.110\text{eV}$$

$$\varepsilon_L = -0.851\text{eV}$$

---

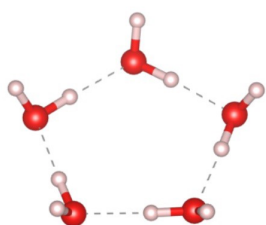

$$\mu_0 = 6.014\text{D}$$

5Rda

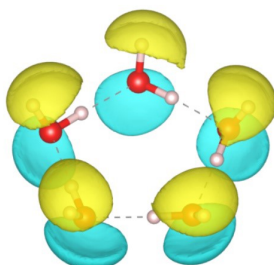

$$\varepsilon_L = -0.268\text{eV}$$

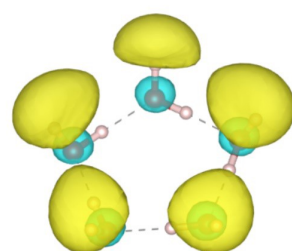

$$E_A = 5.4930\text{meV}$$

$$V_m = 0.074\text{eV}$$

---
