# Supplementary material for: Photo-excited charge transfer from adamantane to electronic bound states in water
Source: Royal Society of Chemistry journal article supplement (doi:10.1039/d3cp04602h), 2024-01-01
Supplement: d3cp04602h3.pdf [file d3cp04602h3.pdf]

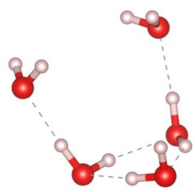

$$\mu_0 = 8.393\text{D}$$

5Y32

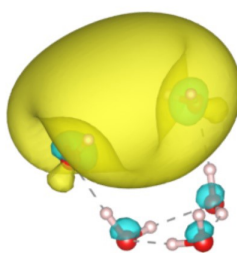

$$\varepsilon_L = -1.125\text{eV}$$

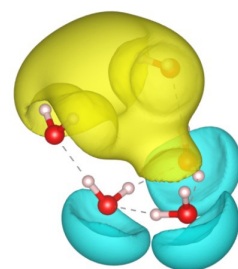

$$E_A = 23.798\text{meV}$$

$$V_m = 0.117\text{eV}$$

---

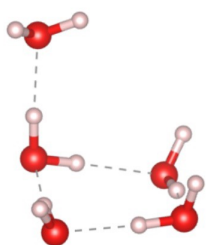

$$\mu_0 = 7.437\text{D}$$

5Y41

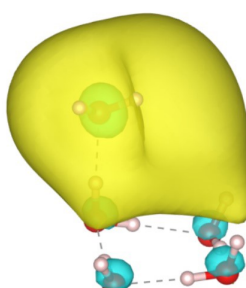

$$\varepsilon_L = -0.742\text{eV}$$

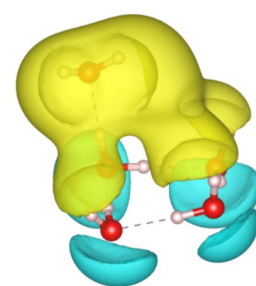

$$E_A = 14.508\text{meV}$$

$$V_m = 0.105\text{eV}$$

---

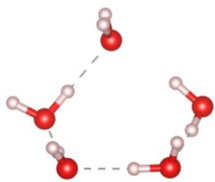

$$\mu_0 = 9.316\text{D}$$

5Rdd

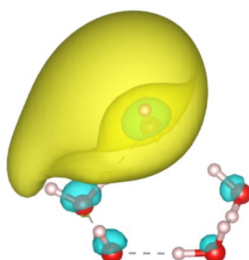

$$\varepsilon_L = -0.892\text{eV}$$

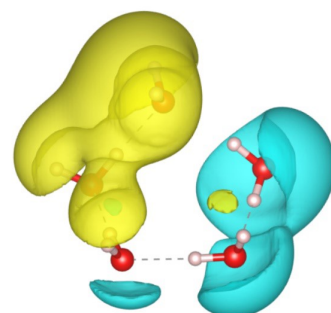

$$E_A = 18.585\text{meV}$$

$$V_m = 0.119\text{eV}$$

---

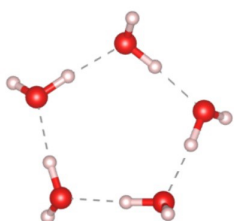

$$\mu_0 = 0.975\text{D}$$

5N

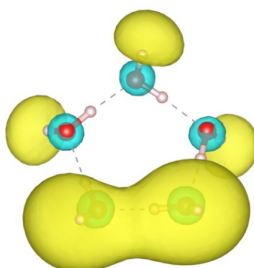

$$\varepsilon_L = 0.0109\text{eV}$$

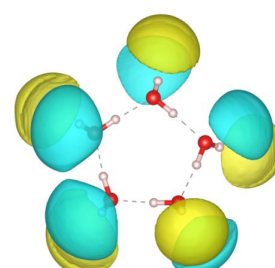

$$E_A = -0.158\text{meV}$$

$$V_m = 0.066\text{eV}$$
